# Supplementary material for: Simulating Absorption Spectra of Flavonoids in Aqueous Solution: A Polarizable QM/MM Study
Source: PubMed Central journal article supplement (PMC7764712; doi:10.3390/molecules25245853), 2020-12-11
Supplement: molecules-25-05853-s001.pdf [file molecules-25-05853-s001.pdf]

# **Supplementary Materials for: Simulating Absorption Spectra of Flavonoids in Aqueous Solution: a Polarizable QM/MM Study**

Sulejman Skoko,<sup>†</sup> Matteo Ambrosetti,<sup>†</sup> Tommaso Giovannini,<sup>‡</sup> and Chiara  
Cappelli<sup>\*,†</sup>

*<sup>†</sup>Scuola Normale Superiore, Piazza dei Cavalieri 7, 56126 Pisa, Italy.*

*<sup>‡</sup>Department of Chemistry, Norwegian University of Science and Technology, 7491  
Trondheim, Norway*

E-mail: chiara.cappelli@sns.it

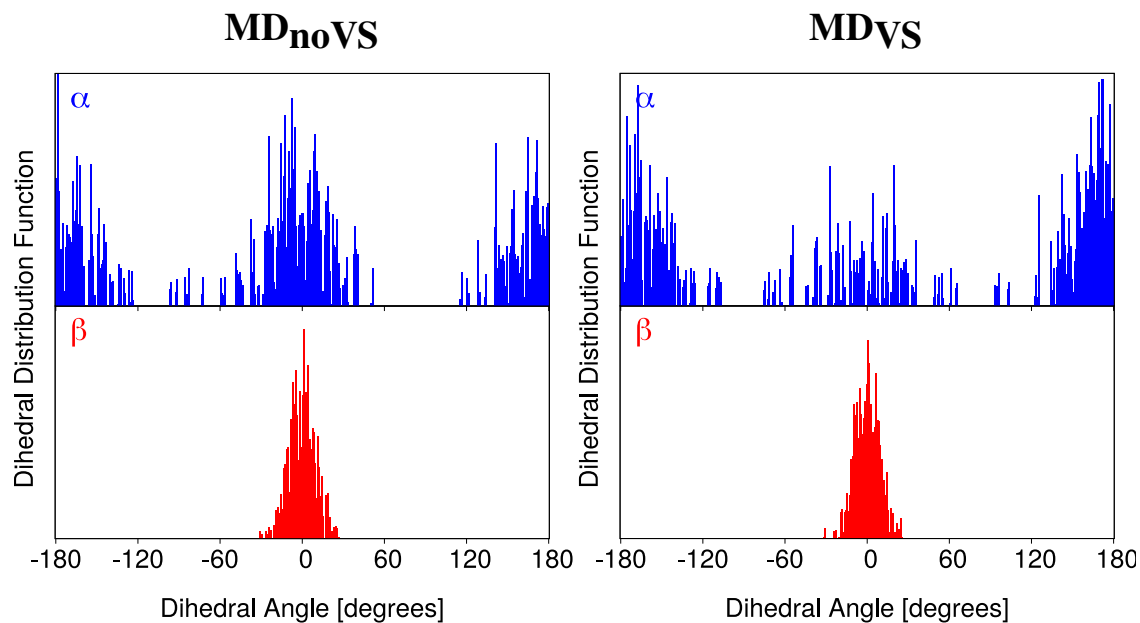

Figure S1: Dihedral distribution functions of  $\alpha$  (top,blue),  $\beta$  (bottom,red) dihedral angles of Luteolin (**L**) as obtained from MD<sub>noVS</sub> (left) and MD<sub>VS</sub> (right).

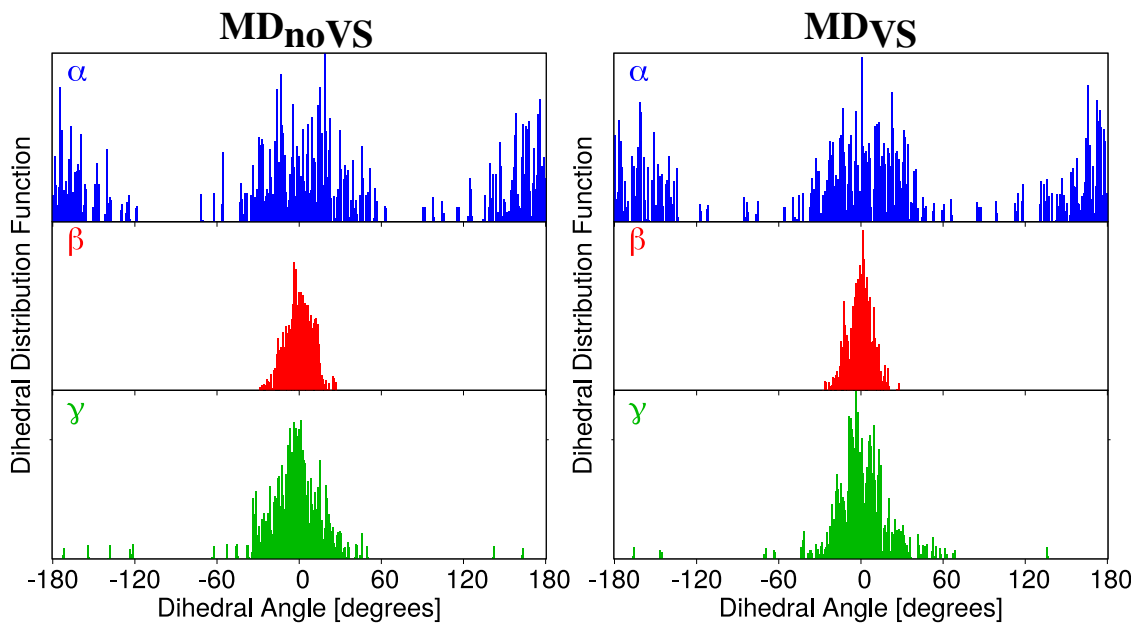

Figure S2: Dihedral distribution functions of  $\alpha$  (top,blue),  $\beta$  (middle,red) and  $\gamma$  (bottom,green) dihedral angles of Kaempferol (**K**) as obtained from MD<sub>noVS</sub> (left) and MD<sub>VS</sub> (right).

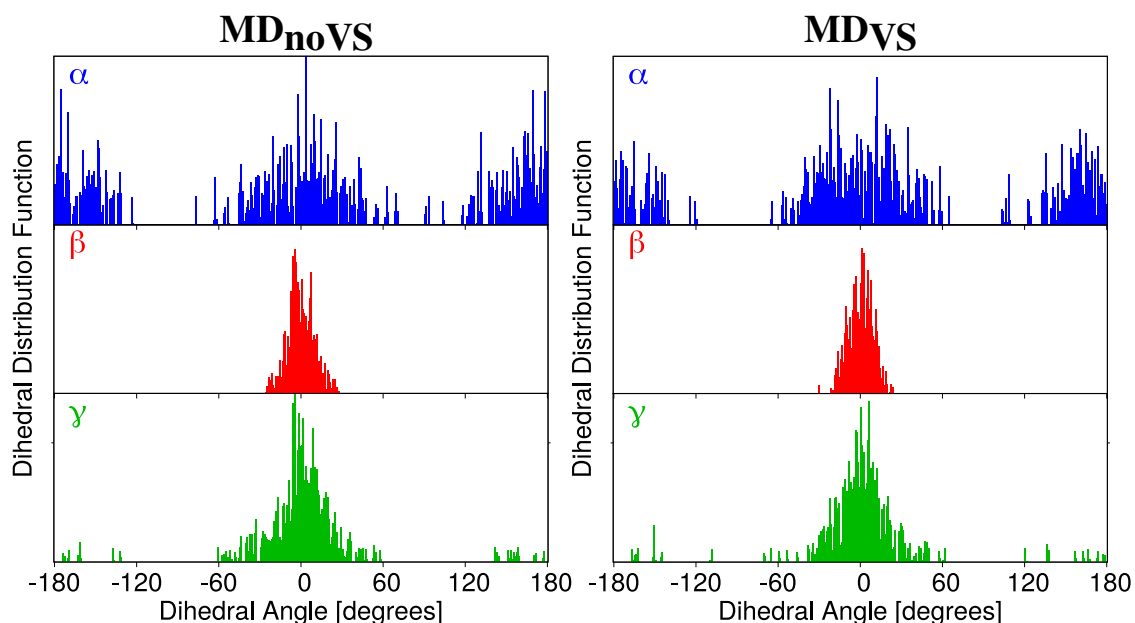

Figure S3: Dihedral distribution functions of  $\alpha$  (top,blue),  $\beta$  (middle,red) and  $\gamma$  (bottom,green) dihedral angles of Quercetin (Q) as obtained from MD<sub>noVS</sub> (left) and MD<sub>vS</sub> (right).

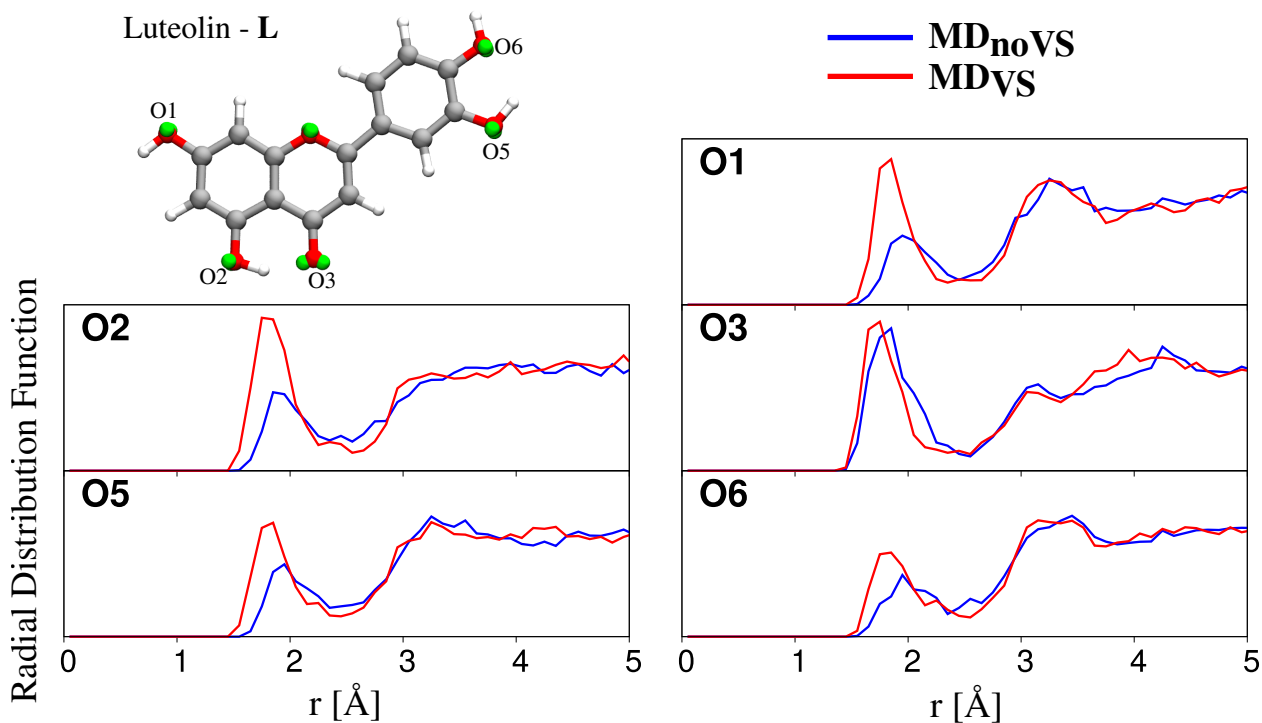

Figure S4: Radial distribution functions between selected Oxygen atoms of Luteolin and water Hydrogen atoms as obtained from MD<sub>noVS</sub> (blue) and MD<sub>vS</sub> (red).

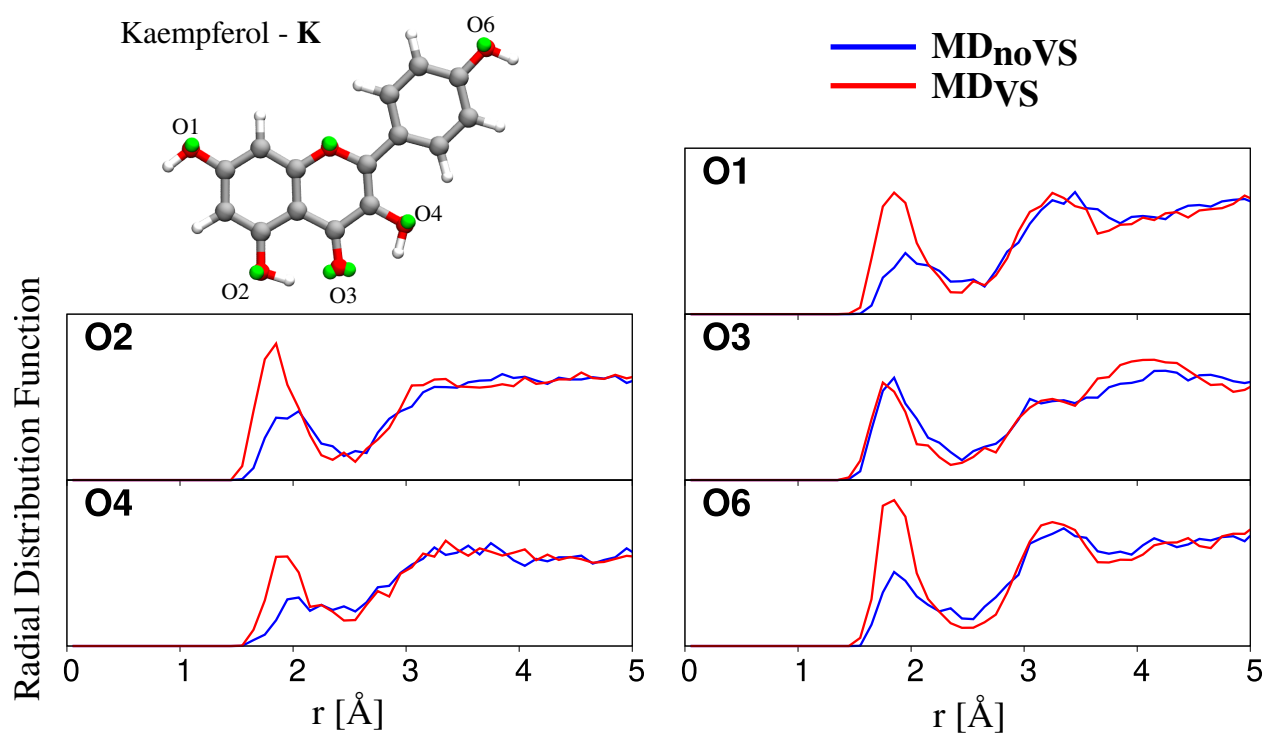

Figure S5: Radial distribution functions between selected Oxygen atoms of Kaempferol and water Hydrogen atoms as obtained from MD<sub>noVS</sub> (blue) and MD<sub>VS</sub> (red).

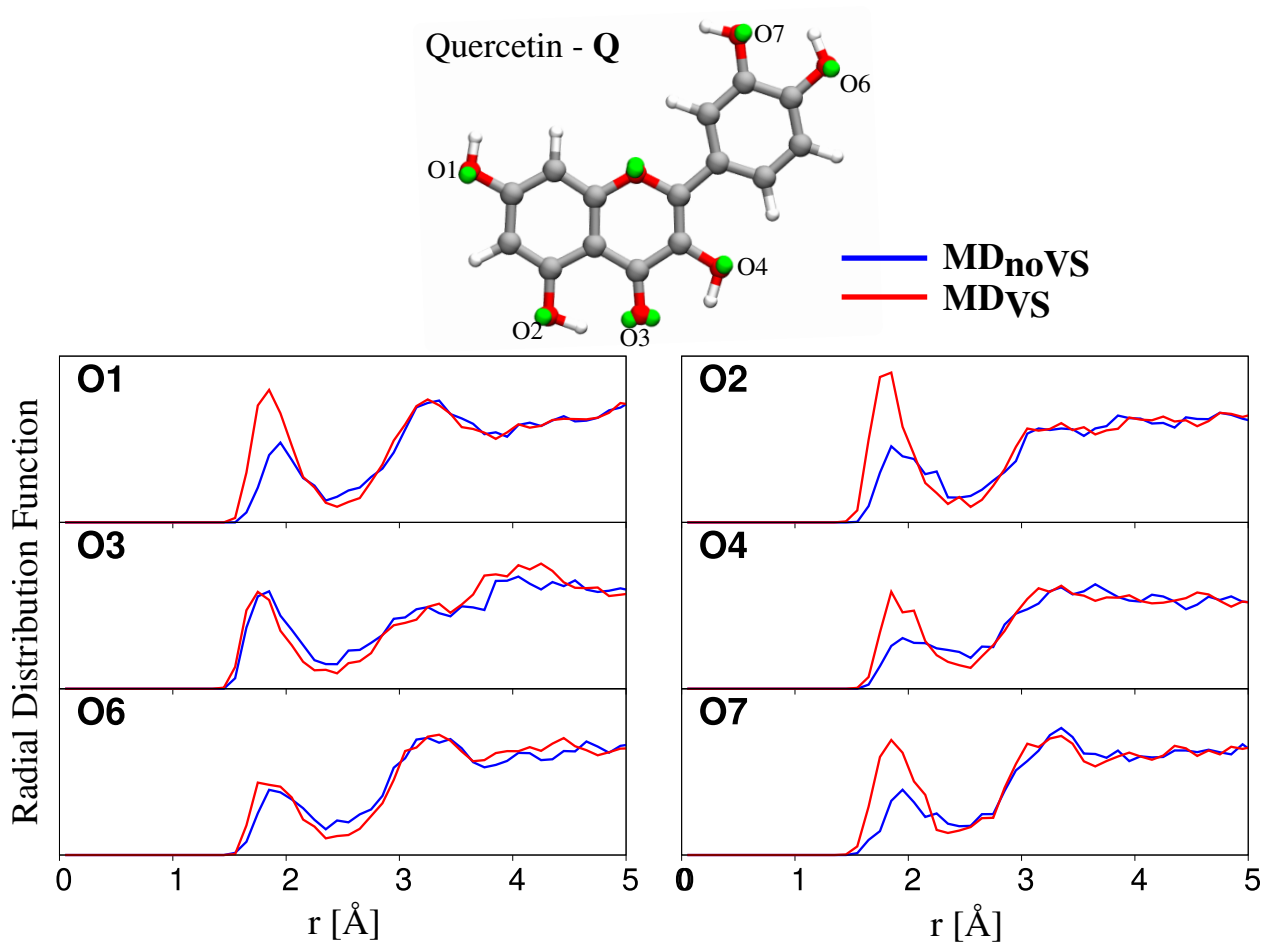

Figure S6: Radial distribution functions between selected Oxygen atoms of Quercetin and water Hydrogen atoms as obtained from MD<sub>noVS</sub> (blue) and MD<sub>VS</sub> (red).

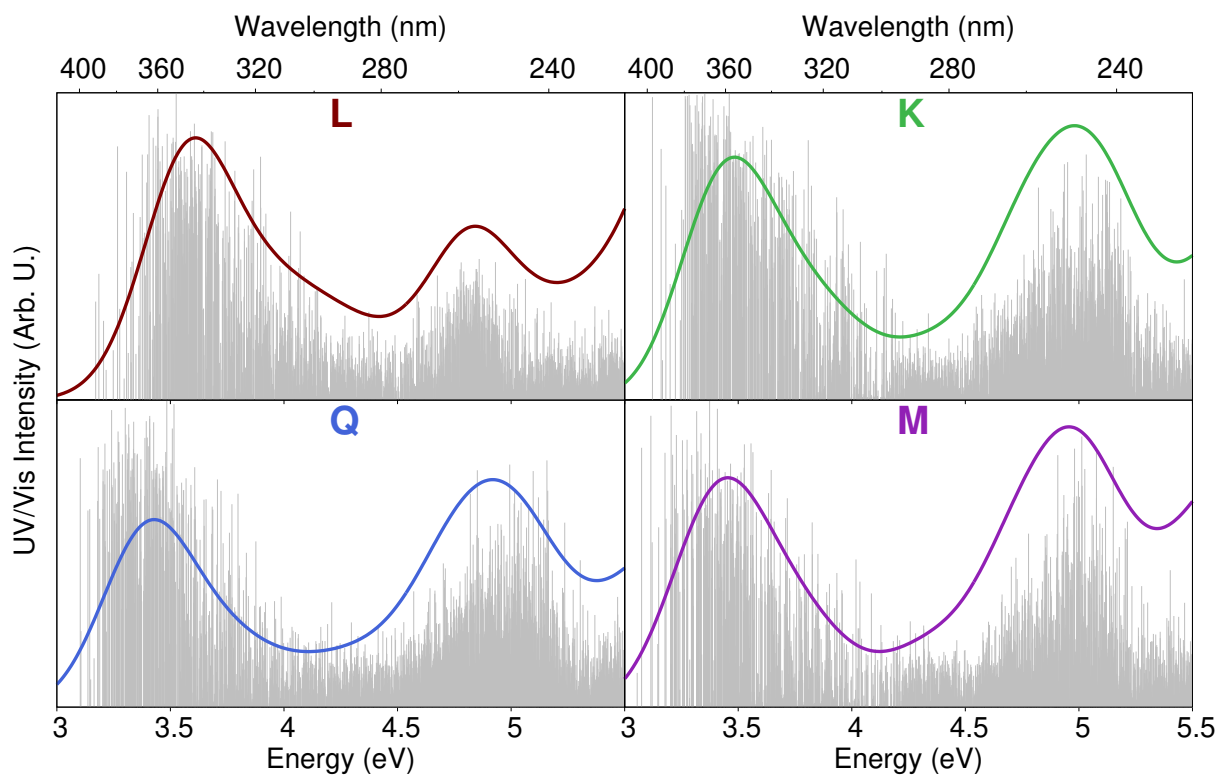

Figure S7: QM/FQ UV/Vis stick spectra computed on the snapshots extracted from MD<sub>VS</sub>. The convoluted QM/FQ spectra are also plotted.

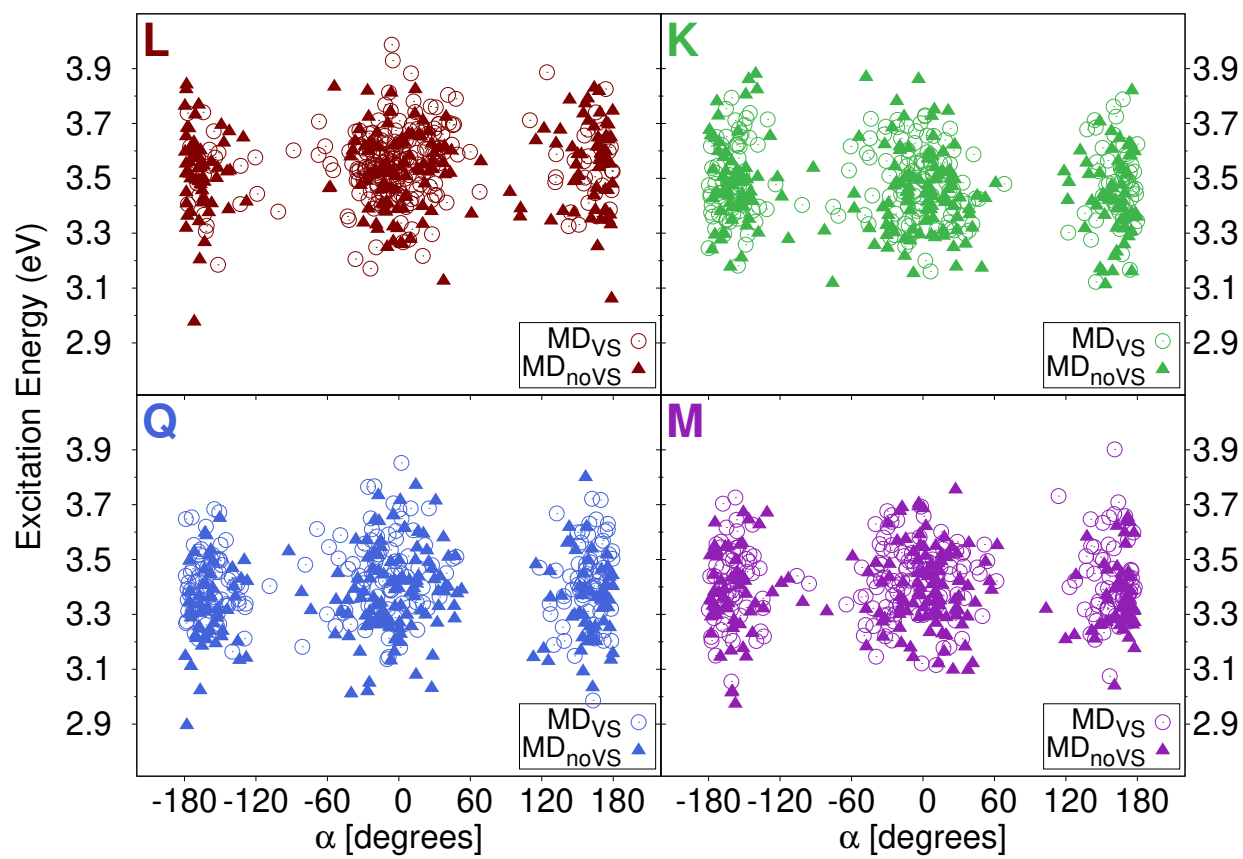

Figure S8: QM/FQ Excitation Energies of the first electronic transition as a function of  $\alpha$  dihedral angle.

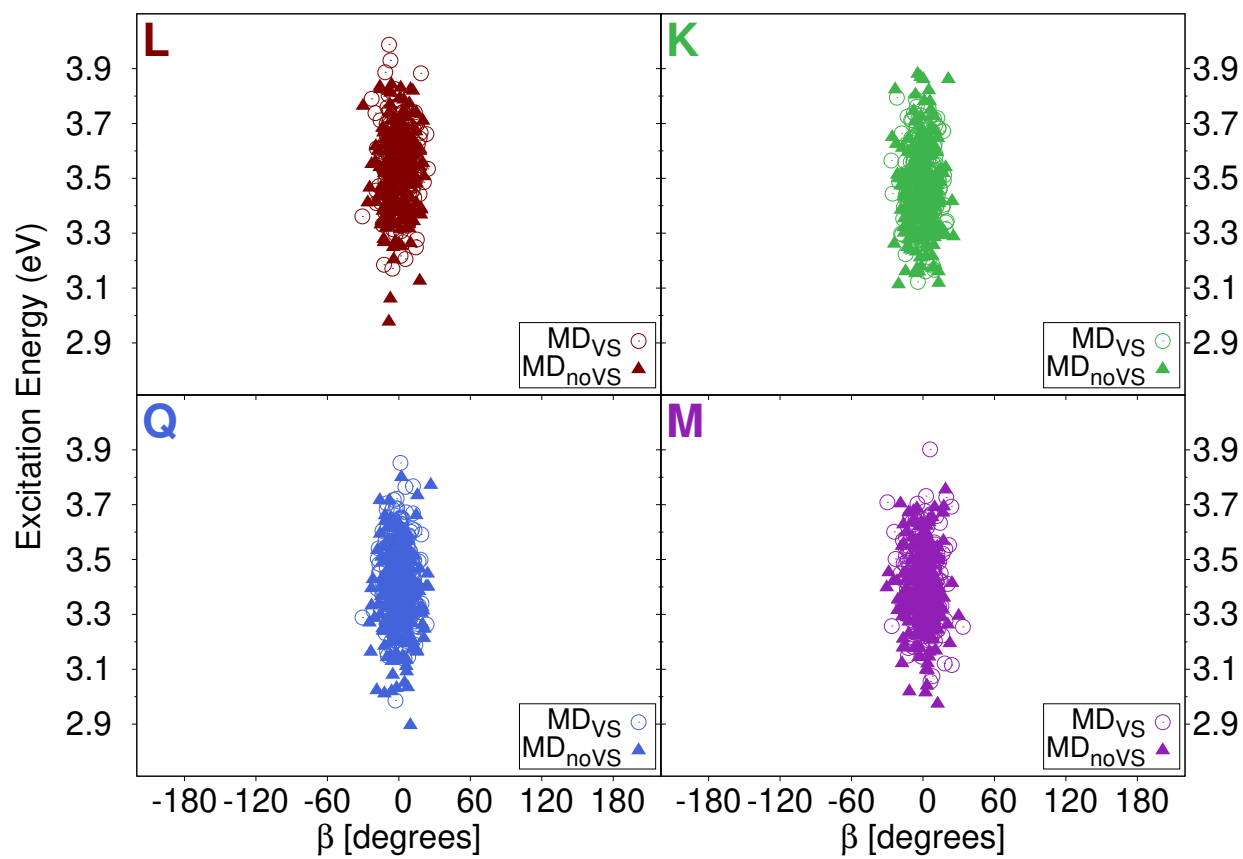

Figure S9: QM/FQ Excitation Energies of the first electronic transition as a function of  $\beta$  dihedral angle.



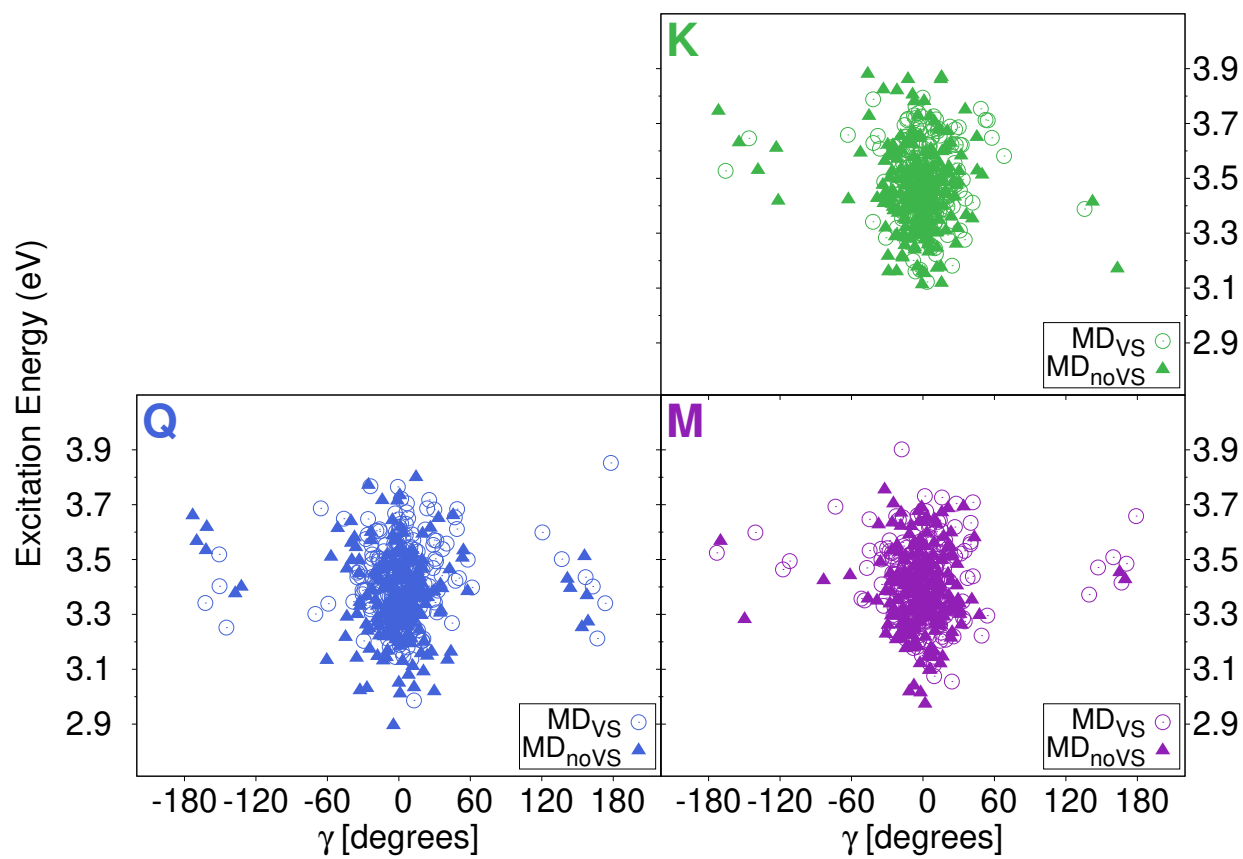

Figure S10: QM/FQ Excitation Energies of the first electronic transition as a function of  $\gamma$  dihedral angle.
